# Supplementary material for: Formation of coronene:water complexes: FTIR study in argon matrices and theoretical characterisation
Source: Royal Society of Chemistry journal article supplement (doi:10.1039/c6cp08559h), 2017-01-01
Supplement: c6cp08559h1.pdf [file c6cp08559h1.pdf]

**“Formation of coronene:water complexes: FTIR study in argon matrices and theoretical characterization”**

A Simon, J.A. Noble, G. Rouaut, A. Moudens, C. Aupetit, C. Iftner, and J. Mascetti\*

DOI: [10.1039/c6cp08559h](https://doi.org/10.1039/c6cp08559h)

**E.S.I.**

**Table S1 and Figures S1 – S5**

**Figure S1: DFTB/FF optimised geometries of  $(\text{C}_6\text{H}_6)(\text{H}_2\text{O})/\text{Ar}$  ((a,b), 425 Ar atoms) and  $(\text{C}_6\text{H}_6)(\text{H}_2\text{O})_2/\text{Ar}$  ((c,d), 424 Ar atoms)**

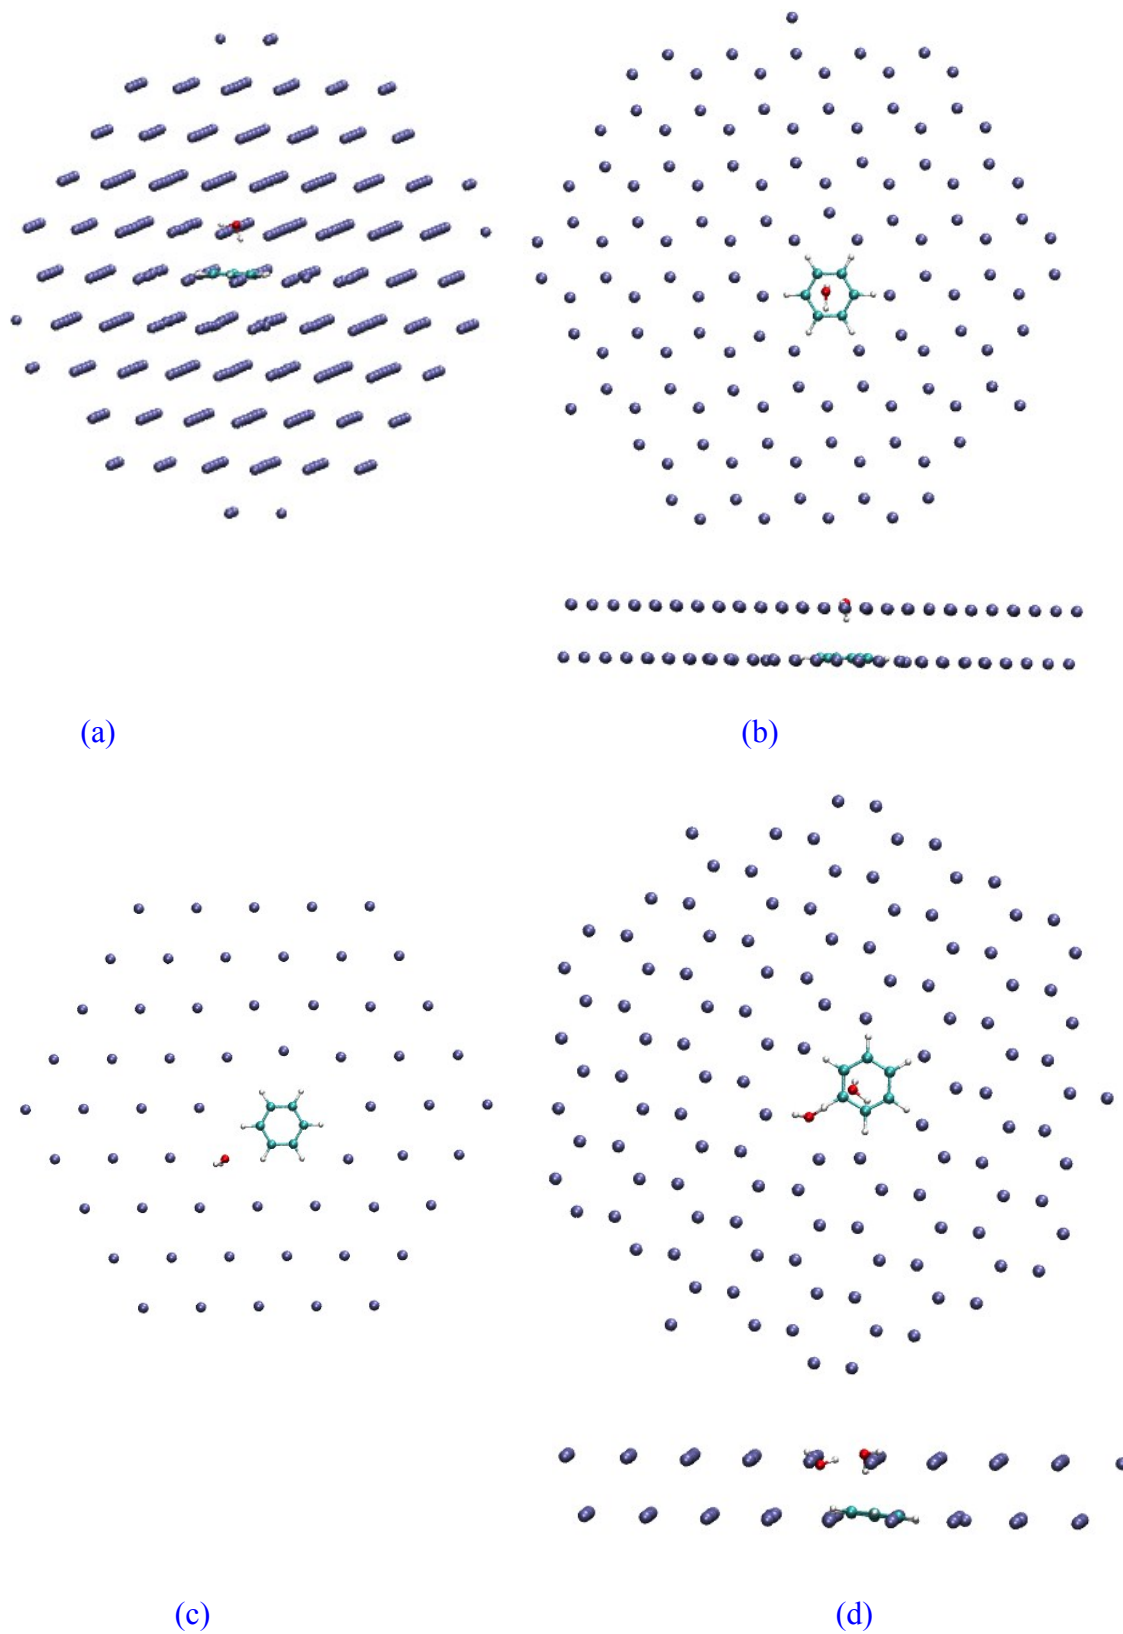

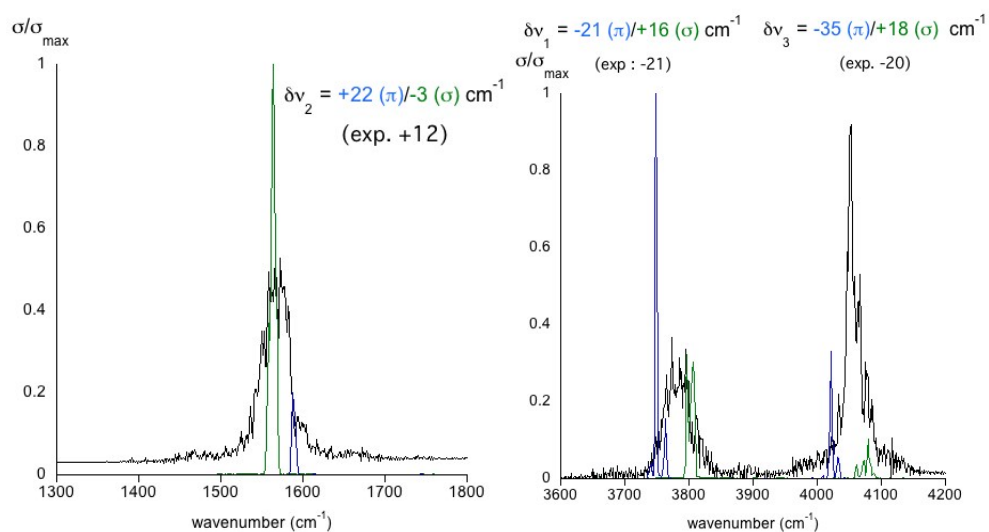

**Figure S2. Simulated (BOMD/DFTB/FF) water bands in the  $(\text{C}_6\text{H}_6)(\text{H}_2\text{O})/\text{Ar}$  complexes (green :  $\sigma$  complexes, blue:  $\pi$  complexes) vs  $(\text{H}_2\text{O})/\text{Ar}$  (black lines). Left panel: bending mode, Right panel: stretching modes. The fact that there are several bands for a given mode is due to slightly different orientations of the water molecule, a typically observed matrix effect. This is not seen in the harmonic spectra as it is a purely dynamic effect.  $\delta\nu = \nu(\text{H}_2\text{O} \text{ in } (\text{C}_6\text{H}_6)(\text{H}_2\text{O})/\text{Ar}) - \nu(\text{H}_2\text{O}/\text{Ar})$ .**

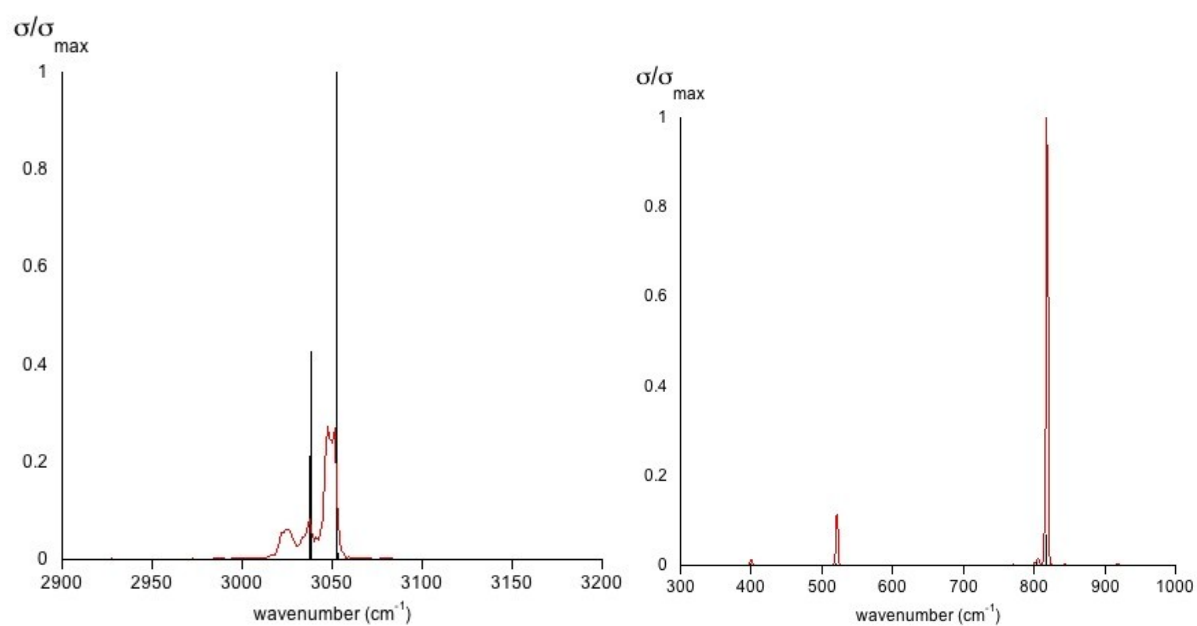

(a)

(b)

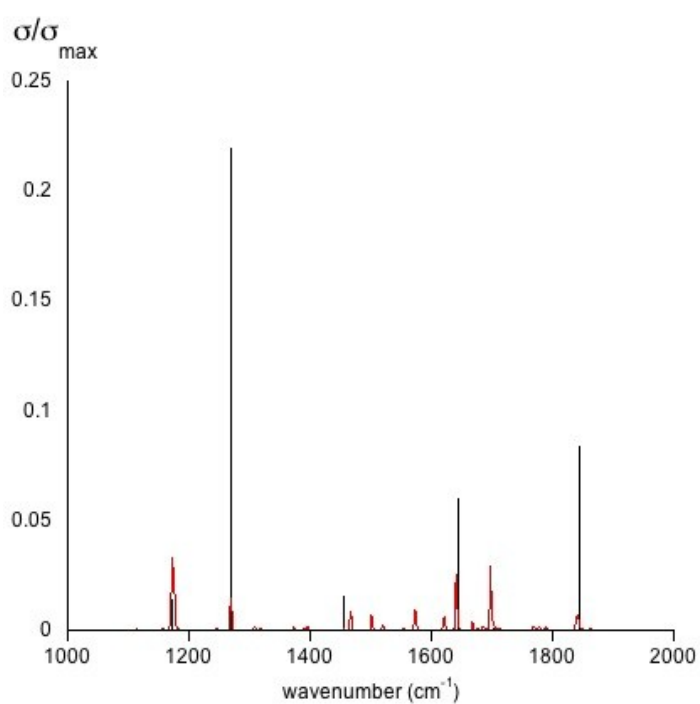

(c)

**Figure S3: Computed harmonic (black) and finite-temperature (red, at 10 K) spectra of  $\text{C}_{24}\text{H}_{12}/\text{Ar}$  computed with the DFTB/FF potential.**

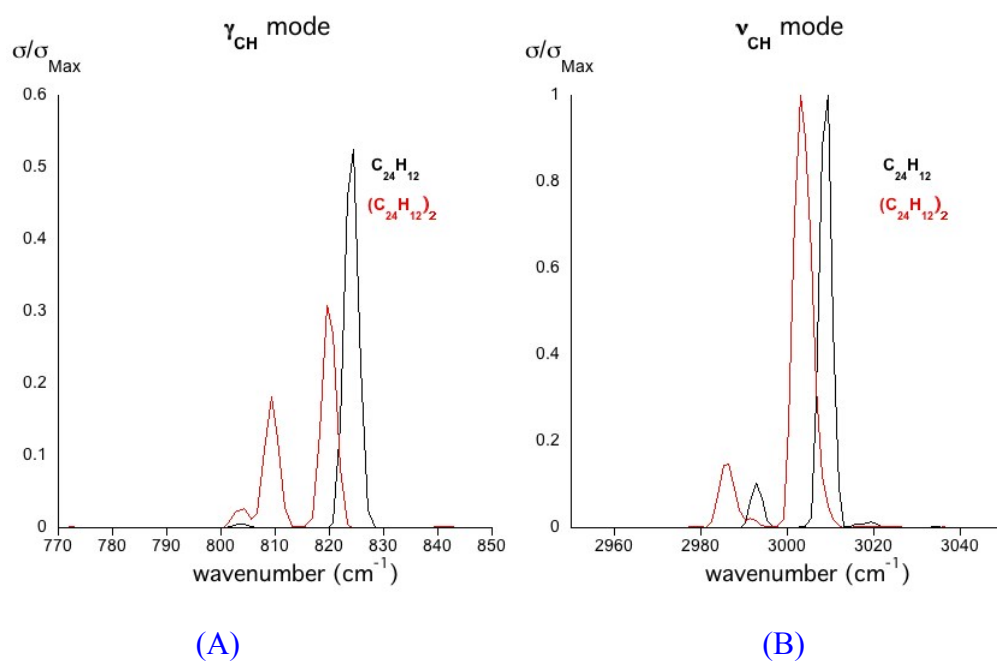

**Figure S4: Simulated spectra (BOMD/DFTB) at 10K of coronene monomer and dimer in the coronene mode regions  $\gamma_{\text{CH}}$  (A), and  $\nu_{\text{CH}}$  (B).**

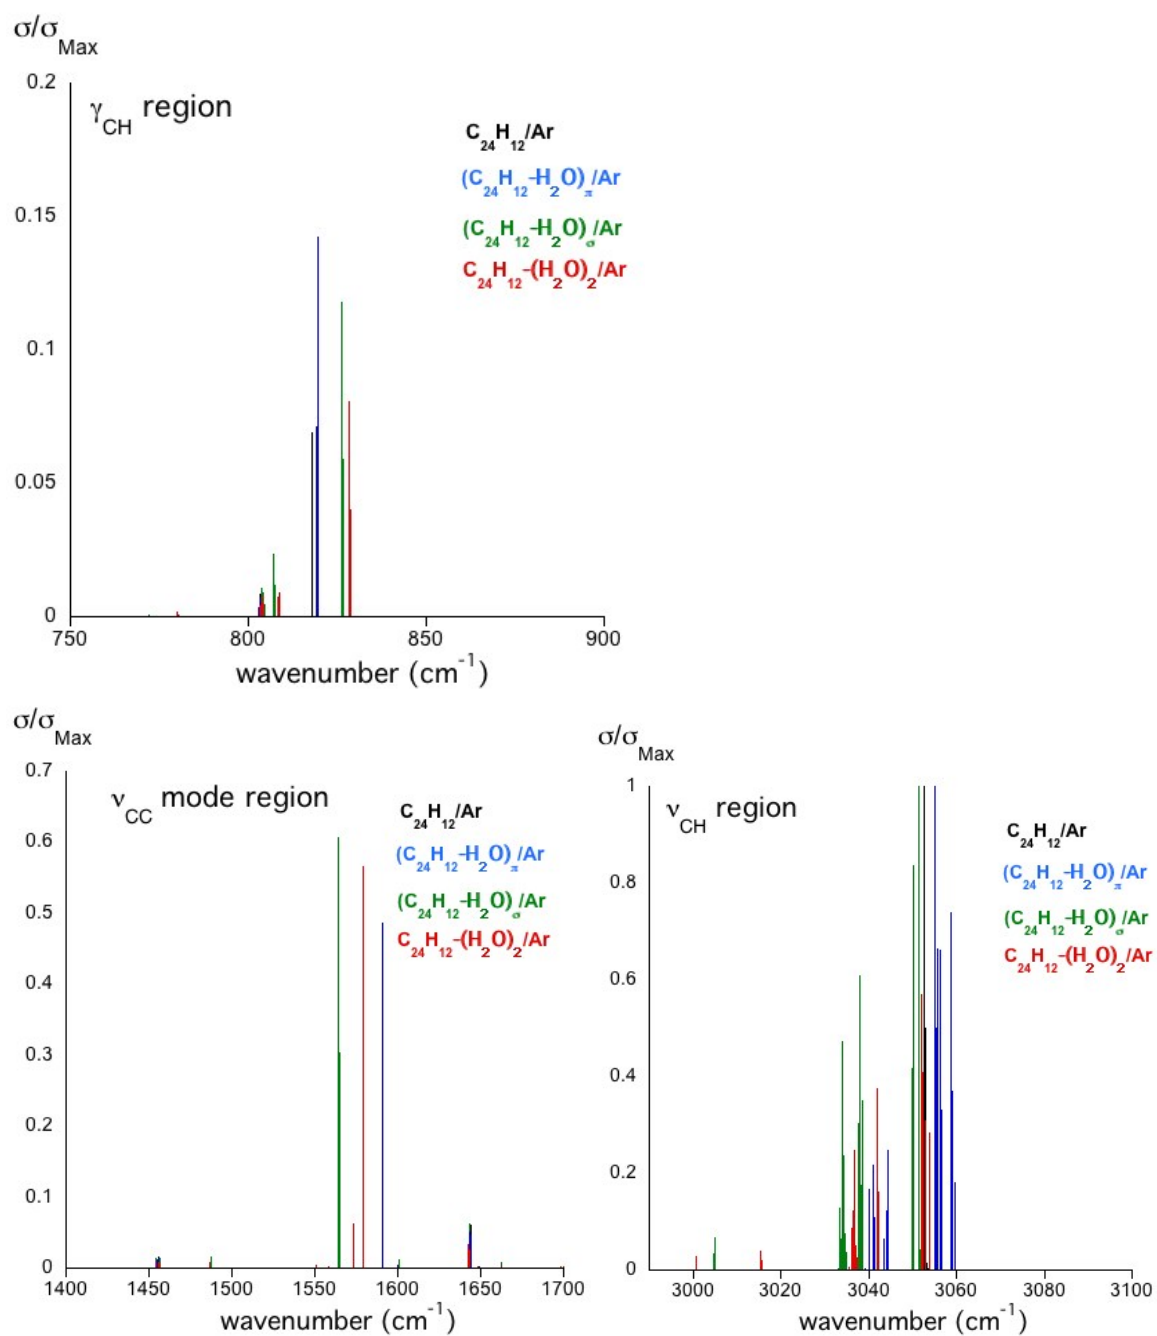

**Figure S5: Computed harmonic spectra of  $\text{C}_{24}\text{H}_{12}/\text{Ar}$  and  $(\text{C}_{24}\text{H}_{12})(\text{H}_2\text{O})_{1,2}$  complexes in the  $\nu_{\text{CH}}$ ,  $\nu_{\text{CC}}$  and  $\gamma_{\text{CCH}}$  vibration regions, at the DFTB/FF and DFTB levels of theory respectively.**

| C <sub>24</sub> H <sub>12</sub> /Ar (DFTB) |                       | C <sub>24</sub> H <sub>12</sub> (DFTB) |                       |          | C <sub>24</sub> H <sub>12</sub> (DFT, scaling factor 0.958, from Langhoff <sup>16</sup> ) |                       |          |          |
|--------------------------------------------|-----------------------|----------------------------------------|-----------------------|----------|-------------------------------------------------------------------------------------------|-----------------------|----------|----------|
| wavenumber<br>(cm <sup>-1</sup> )          | Intensity<br>(km/mol) | wavenumber<br>(cm <sup>-1</sup> )      | Intensity<br>(km/mol) | mode     | wavenumber<br>(cm <sup>-1</sup> )                                                         | Intensity<br>(km/mol) | mode     | symmetry |
| 137<br>(115)                               | 0.06<br>(0.003)       | 116                                    | 0.01                  | δCCC oop | 123                                                                                       | 5                     | δCCC oop | a2u      |
| 400                                        | 1                     | 396                                    | 0.4                   | δCCC ip  | 378                                                                                       | 3                     | δCCC ip  | e1u      |
| 519                                        | 1                     | 518                                    | 0.6                   | δCCC oop | 549                                                                                       | 28                    | δCCH oop | a2u      |
| 771                                        | 0.01                  | 774                                    | 0                     | γCH      | 774                                                                                       | 13                    | δCCH ip  | e1u      |
| 803                                        | 1                     | 802                                    | 0.8                   | δCCH ip  | 802                                                                                       | 0.15                  | δCCC ip  | e1u      |
| 818                                        | 24                    | 823                                    | 22                    | γCH      | 864                                                                                       | 175                   | γCH      | a2u      |
| 1172                                       | 5                     | 1167                                   | 4                     | δCCH     | 1140                                                                                      | 6                     | δCH      | e1u      |
| 1268                                       | 38                    | 1264                                   | 41                    | δCCH     | 1214                                                                                      | 1                     | δCH      | e1u      |
| 1455                                       | 3                     | 1452                                   | 3                     | vCC+δCCH | 1312                                                                                      | 24                    | δCH      | e1u      |
| 1644                                       | 10                    | 1639                                   | 10                    | vCC      | 1387                                                                                      | 0.5                   | δCH+vCC  | e1u      |
| 1701                                       | 0.4                   | 1694                                   | 0.05                  | vCC      | 1495                                                                                      | 1                     | δCH+vCC  | e1u      |
| 1845                                       | 14                    | 1838                                   | 13                    | vCC      | 1603                                                                                      | 13                    | δCH+vCC  | e1u      |
| 3038                                       | 75                    | 2992                                   | 75                    | vCH      | 3042                                                                                      | 8                     | vCH      | e1u      |
| 3053                                       | 350                   | 3008                                   | 350                   | vCH      | 3064                                                                                      | 142                   | vCH      | a2u      |

**Table S1: harmonic spectra (positions, intensities and assignment) of coronene in Ar matrix, in the gas phase, and DFT values (gas phase) from ref 16. One can see that the assignment of bending modes is difficult based on both DFB and DFT harmonic calculations.**
